# Supplementary material for: Reply to the ‘Comment on “Topography of the Free Energy Landscape on the Claisen–Schmidt Condensation: Solvent and Temperature Effect in the Rate-Controlling Step”’ by N. D. Coutinho, H. G. Machado, V. H. Carvalho-Silva and W. A. da Silva, Phys. Chem. Chem. Phys., 2021, 23, 6738
Source: Royal Society of Chemistry journal article supplement (doi:10.1039/d1cp02799a), 2021-01-01
Supplement: d1cp02799a1.pdf [file d1cp02799a1.pdf]

**Reply to the ‘Comment on “Topography of the Free Energy Landscape on the Claisen-Schmidt Condensation: Solvent and Temperature Effect in the Rate-Controlling Step”’ by N. D. Coutinho, H. G. Machado, V. H. Carvalho-Silva and W. A. da Silva, Phys. Chem. Chem. Phys., 2021, 23, 6738**

**Nayara Dantas Coutinho<sup>\*a</sup>, Hugo Gontijo Machado<sup>b</sup>, Valter Henrique Carvalho-Silva<sup>b</sup>, Wender Alves da Silva<sup>\*a</sup>**

- a. Laboratory of Bioactive Compounds Synthesis N.T.S., University of Brasilia (IQ-UnB), Campus Universitário Darcy Ribeiro, Brasília, DF, Brazil
- b. Modeling of Physical and Chemical Transformations Division, Theoretical and Structural Chemistry Group, Research and Graduate Center, Goias State University, 75132-903, Anapolis, Brazil;

**\*E-mail:** [nayaradcoutinho@gmail.com](mailto:nayaradcoutinho@gmail.com), [fatiolog@gmail.com](mailto:fatiolog@gmail.com), [wender@unb.br](mailto:wender@unb.br)

Cartesian coordinate of all stationary points with explicit water molecules

**Enolate (2<sup>-</sup>) with 3 explicit water**

|   |           |           |           |
|---|-----------|-----------|-----------|
| C | 0.999078  | 0.439267  | -0.054591 |
| C | 1.220561  | -0.893406 | -0.444367 |
| C | 2.514273  | -1.413601 | -0.541644 |
| C | 3.620223  | -0.613639 | -0.238907 |
| C | 3.415740  | 0.710803  | 0.166164  |
| C | 2.122134  | 1.228343  | 0.259296  |
| C | -0.409207 | 0.967034  | 0.023267  |
| C | -0.659888 | 2.302058  | -0.097315 |
| O | -1.357953 | 0.050584  | 0.186002  |
| H | 0.129730  | 3.021552  | -0.277871 |
| H | 0.365437  | -1.520661 | -0.671577 |
| H | 2.657202  | -2.445150 | -0.852436 |
| H | 4.265153  | 1.338980  | 0.420963  |
| H | 1.983799  | 2.250305  | 0.597887  |
| H | -1.676207 | 2.679313  | -0.036640 |
| H | 4.626472  | -1.017171 | -0.307931 |
| O | -1.255747 | -1.661729 | 2.252841  |
| H | -2.082744 | -1.493123 | 2.721502  |
| H | -1.257598 | -1.031022 | 1.479950  |
| O | -2.569455 | -1.235689 | -1.909689 |
| H | -3.433113 | -0.860727 | -1.679689 |
| H | -1.985196 | -0.836861 | -1.219540 |
| O | -3.985554 | 0.545320  | 0.122399  |
| H | -4.191072 | 1.478333  | -0.016546 |
| H | -2.989669 | 0.487186  | 0.198085  |

B2LYP:

Energy+ZPE (kcal/mol): -384304.33031669864

B3LYP:

Energy+ZPE (kcal/mol): -385034.116409965

Frequencies: [44.81; 57.12; 71.74; 80.41; 90.37; 100.78; 113.57; 149.62; 208.05; 237.62; 286.49; 352.23; 366.83; 494.54; 555.55; 597.63; 600.82; 622.92; 692.23; 736.06; 762.24; 880.49; 904.99; 911.83; 986.67; 1016.74; 1055.56; 1087.23; 1094.17; 1142.48; 1234.6; 1236.66; 1277.94; 1344.04; 1422.5; 1442.61; 1448.59; 1454.02; 1503.66; 1580.97; 1626.86; 1691.29; 1720.18; 1888.99; 1921.6; 1947.45; 2034.01; 2120.72; 2188.35; 2297.57; 2339.2; 2361.21; 2366.14; 2379.19; 2444.16; 4491.36; 4549.76; 4568.47; 4579.23; 4598.58; 4608.78; 4613.25; 4625.06; 4676.44; 4896.45; 5470.53; 5558.06; 5560.22]

### Hydroxide with 3 explicit water

|   |           |           |           |
|---|-----------|-----------|-----------|
| O | 0.005595  | -0.040073 | 0.653187  |
| H | 0.006165  | -0.051999 | 1.619758  |
| O | 2.142473  | -1.223555 | -0.261072 |
| H | 1.319964  | -0.753045 | 0.111212  |
| H | 2.805161  | -0.533427 | -0.388201 |
| O | -2.086044 | -1.316992 | -0.247088 |
| H | -2.704254 | -0.640497 | -0.550184 |
| H | -1.280716 | -0.811764 | 0.115496  |
| O | -0.161502 | 2.412753  | -0.215149 |
| H | -0.078637 | 1.461120  | 0.137555  |
| H | 0.728145  | 2.672546  | -0.484671 |

B2LYP:

Energy+ZPE (kcal/mol): -191221.2931371083

B3LYP:

Energy+ZPE (kcal/mol): -191536.442674329

Frequencies: [50.17; 51.43; 93.18; 130.79; 146.83; 156.06; 385.66; 420.09; 427.15; 664.22; 679.25; 743.45; 783.65; 793.95; 1496.74; 1505.91; 1520.72; 2346.34; 2380.38; 2390.58; 3940.37; 3955.17; 4209.53; 5524.14; 5555.17; 5555.65; 5556.85/]

### Step 2 Product (3<sup>-</sup>) with 3 explicit water

|   |           |           |           |
|---|-----------|-----------|-----------|
| C | 2.491871  | -0.169794 | 0.530404  |
| C | 3.462293  | -1.187884 | 0.487456  |
| C | 4.643786  | -1.014201 | -0.230353 |
| C | 4.877070  | 0.185262  | -0.915096 |
| C | 3.922034  | 1.205207  | -0.878491 |
| C | 2.735227  | 1.029653  | -0.162518 |
| C | 1.238804  | -0.402799 | 1.323340  |
| C | 0.104253  | 0.594852  | 1.246662  |
| O | 1.133401  | -1.416086 | 2.019185  |
| H | 0.486550  | 1.616709  | 1.329743  |
| H | 3.270857  | -2.112298 | 1.021811  |
| H | 5.382797  | -1.809477 | -0.258452 |
| H | 5.798395  | 0.322701  | -1.473627 |
| H | 4.099136  | 2.137487  | -1.406162 |
| H | 2.008773  | 1.834486  | -0.145397 |
| H | -0.561501 | 0.407014  | 2.092874  |
| C | -3.098243 | -2.455643 | 0.405578  |
| C | -2.490752 | -1.208117 | 0.564942  |
| C | -1.411294 | -0.823911 | -0.246901 |
| C | -0.961496 | -1.721361 | -1.224700 |
| C | -1.566379 | -2.973616 | -1.389648 |
| C | -2.637335 | -3.345636 | -0.573106 |
| H | -3.932656 | -2.735329 | 1.043456  |
| H | -2.860289 | -0.520159 | 1.320006  |

|   |           |           |           |
|---|-----------|-----------|-----------|
| H | -0.133353 | -1.436828 | -1.870154 |
| H | -1.203801 | -3.652149 | -2.157232 |
| H | -3.111786 | -4.314918 | -0.698588 |
| C | -0.744044 | 0.542085  | -0.076756 |
| O | -1.661926 | 1.594977  | -0.078615 |
| H | -0.036362 | 0.651799  | -0.917837 |
| O | -0.437945 | 3.896028  | -0.438851 |
| H | -0.909379 | 3.015327  | -0.276830 |
| H | -0.629718 | 4.439041  | 0.336016  |
| O | -3.201819 | 2.202018  | 1.973541  |
| H | -2.612455 | 1.922312  | 1.204140  |
| H | -4.105781 | 2.023113  | 1.685846  |
| O | -3.184358 | 1.772562  | -2.219936 |
| H | -2.931709 | 2.608793  | -2.630720 |
| H | -2.591317 | 1.681797  | -1.406355 |

B2LYP:

Energy+ZPE (kcal/mol): -600685.3336635352

B3LYP:

Energy+ZPE (kcal/mol): -601842.020708306

Frequencies: [25.42; 37.12; 46.7; 54.38; 60.11; 65.36; 71.5; 78.33; 89.05; 99.61; 117.79; 134.57; 138.49; 176.2; 203.49; 241.29; 249.82; 272.73; 315.71; 354.55; 421.85; 476.97; 523.96; 556.89; 596.69; 598.02; 641.44; 649.93; 712.17; 732.21; 754.42; 772.57; 794.35; 878.94; 903.26; 905.73; 925.64; 983.54; 1009.27; 1025.17; 1084.92; 1104.42; 1115.47; 1175.33; 1239.93; 1242.64; 1333.94; 1355.73; 1384.69; 1399.72; 1417.49; 1423.42; 1426.08; 1439.28; 1445.01; 1455.84; 1456.0; 1458.91; 1464.0; 1499.39; 1506.71; 1536.98; 1560.04; 1588.62; 1601.75; 1666.6; 1691.96; 1696.61; 1722.9; 1726.11; 1743.29; 1838.37; 1850.56; 1900.19; 1927.95; 1948.47; 1953.79; 1957.72; 2007.15; 2125.92; 2134.48; 2136.08; 2194.47; 2196.04; 2331.54; 2340.3; 2359.5; 2366.16; 2366.64; 2385.7; 2401.0; 2442.38; 4127.66; 4186.36; 4221.93; 4391.87; 4417.63; 4500.05; 4557.12; 4568.99; 4582.22; 4585.14; 4595.06; 4598.9; 4606.23; 4613.05; 4627.66; 4632.26; 5554.07; 5554.73; 5555.53]

#### Step 4 Product (5) with 3 explicit water

|   |           |           |           |
|---|-----------|-----------|-----------|
| C | 1.699818  | -0.720190 | -0.055152 |
| C | 2.362950  | -0.951566 | 1.163931  |
| C | 3.109929  | -2.113961 | 1.365562  |
| C | 3.225180  | -3.063154 | 0.342653  |
| C | 2.585803  | -2.837734 | -0.879449 |
| C | 1.829274  | -1.677080 | -1.075213 |
| C | 0.926645  | 0.558009  | -0.239447 |
| C | -0.372852 | 0.586931  | -0.669200 |
| O | 1.594643  | 1.660495  | 0.079647  |
| H | 2.282827  | -0.214454 | 1.957403  |
| H | 3.603569  | -2.279025 | 2.319377  |

|   |           |           |           |
|---|-----------|-----------|-----------|
| H | 3.811656  | -3.964567 | 0.495841  |
| H | 2.678783  | -3.561005 | -1.684912 |
| H | 1.350519  | -1.507804 | -2.034883 |
| H | -0.841028 | 1.566865  | -0.754249 |
| C | -4.842492 | 0.479579  | -0.128197 |
| C | -3.621455 | 0.346630  | -0.795234 |
| C | -2.609002 | -0.476426 | -0.278652 |
| C | -2.852226 | -1.169866 | 0.915659  |
| C | -4.071881 | -1.037940 | 1.587238  |
| C | -5.072596 | -0.210825 | 1.067393  |
| H | -5.615914 | 1.120482  | -0.543018 |
| H | -3.452357 | 0.876164  | -1.727795 |
| H | -2.079951 | -1.817332 | 1.324530  |
| H | -4.241615 | -1.585114 | 2.510532  |
| H | -6.022572 | -0.109089 | 1.584394  |
| C | -1.253555 | -0.590239 | -0.961483 |
| O | -1.491974 | -0.744525 | -2.396274 |
| H | -0.774196 | -1.508227 | -0.604320 |
| H | -0.767223 | -0.285393 | -2.843495 |
| O | 1.053070  | 3.902247  | -1.340397 |
| H | 1.920723  | 4.283782  | -1.523952 |
| H | 1.233116  | 3.071443  | -0.823257 |
| O | 4.282088  | 1.797361  | -0.069401 |
| H | 4.641971  | 0.946694  | 0.211991  |
| H | 3.293016  | 1.692816  | -0.006022 |
| O | 0.980521  | 2.748072  | 2.481265  |
| H | 1.183837  | 2.350615  | 1.594203  |
| H | 0.186823  | 3.280952  | 2.346454  |

B2LYP:

Energy+ZPE (kcal/mol): -600678.3961034988

B3LYP:

Energy+ZPE (kcal/mol): -601835.790798954

Frequencies: [19.4; 31.42; 38.72; 45.56; 52.44; 55.63; 63.07; 69.95; 77.81; 81.2; 93.64; 124.08; 146.01; 158.08; 208.71; 230.3; 257.54; 268.15; 289.75; 327.05; 344.88; 378.71; 444.58; 524.1; 540.79; 596.35; 600.98; 601.46; 629.43; 663.6; 702.28; 710.05; 782.1; 827.54; 890.97; 904.22; 909.4; 934.51; 961.6; 1020.71; 1025.73; 1082.69; 1126.37; 1132.52; 1137.51; 1177.04; 1195.1; 1209.84; 1221.17; 1234.48; 1239.67; 1331.6; 1348.23; 1364.45; 1419.09; 1424.19; 1442.38; 1447.27; 1454.72; 1455.28; 1503.02; 1505.77; 1565.88; 1580.77; 1589.92; 1658.24; 1690.3; 1692.4; 1707.8; 1719.19; 1723.55; 1772.78; 1808.64; 1902.87; 1906.93; 1943.93; 1949.5; 1949.9; 1962.36; 2015.11; 2117.27; 2134.73; 2190.66; 2196.3; 2300.73; 2334.12; 2340.4; 2347.78; 2364.57; 2368.4; 2374.07; 2403.3; 4396.11; 4532.12; 4562.79; 4572.19; 4573.35; 4582.32; 4586.86; 4597.33; 4602.55; 4603.27; 4605.22; 4611.97; 4613.54; 4659.42; 4766.51; 5468.91; 5557.05; 5558.32; 5560.97]

**Step 1 TS (1<sup>‡</sup>) with 3 explicit water**

|   |           |           |           |
|---|-----------|-----------|-----------|
| C | -1.789061 | -0.198163 | 0.278918  |
| C | -2.897323 | -0.968001 | -0.114867 |
| C | -4.060965 | -0.357909 | -0.584273 |
| C | -4.130617 | 1.036680  | -0.681914 |
| C | -3.031378 | 1.813704  | -0.302690 |
| C | -1.871728 | 1.201718  | 0.179898  |
| C | -0.554143 | -0.904760 | 0.780483  |
| C | 0.534289  | -0.144386 | 1.379902  |
| O | -0.469578 | -2.141570 | 0.591606  |
| H | 1.391627  | 0.121051  | 0.433361  |
| H | -2.830057 | -2.048279 | -0.043251 |
| H | -4.911843 | -0.967047 | -0.875791 |
| H | -5.034074 | 1.513685  | -1.050886 |
| H | -3.076079 | 2.896043  | -0.381774 |
| H | -1.028162 | 1.820020  | 0.466408  |
| H | 1.115947  | -0.763928 | 2.067927  |
| H | 0.243528  | 0.798507  | 1.845004  |
| O | 2.379508  | 0.304763  | -0.473646 |
| H | 1.949339  | 0.534517  | -1.311179 |
| O | 3.275435  | 2.636613  | 0.611984  |
| H | 2.930204  | 1.803305  | 0.190308  |
| H | 3.418891  | 3.255779  | -0.114768 |
| O | 5.048837  | -0.055543 | -0.915281 |
| H | 5.466466  | 0.670486  | -0.434427 |
| H | 4.074463  | 0.064639  | -0.761967 |
| O | 2.192809  | -2.545145 | -0.452078 |
| H | 2.367509  | -1.579362 | -0.510374 |
| H | 1.311722  | -2.585651 | -0.032004 |

B2LYP:

Energy+ZPE (kcal/mol): -432173.886275471

B3LYP:

Energy+ZPE (kcal/mol): -432986.422717263

Frequencies: [-901.6647; 26.04; 28.34; 39.64; 54.53; 71.36; 78.9; 106.42; 159.97; 179.23; 200.27; 229.97; 243.38; 334.46; 352.7; 372.8; 543.15; 575.68; 596.07; 619.6; 642.33; 700.96; 716.66; 778.15; 808.34; 817.9; 847.88; 904.82; 915.41; 934.91; 998.32; 1018.78; 1068.87; 1086.27; 1137.61; 1209.6; 1239.83; 1240.9; 1362.19; 1427.79; 1434.1; 1456.57; 1457.59; 1496.81; 1504.15; 1587.91; 1605.76; 1694.94; 1721.27; 1878.12; 1922.67; 1952.32; 2072.12; 2120.04; 2137.86; 2178.49; 2192.92; 2310.35; 2353.6; 2370.36; 2377.57; 2383.85; 2442.17; 4439.29; 4540.32; 4579.11; 4591.86; 4608.46; 4626.0; 4626.4; 4629.44; 4740.49; 5043.69; 5228.77; 5480.32; 5553.58; 5558.88]

**Step 2 TS (2<sup>‡</sup>) with 3 explicit water**

|   |          |           |          |
|---|----------|-----------|----------|
| C | 2.618109 | -0.159510 | 0.439853 |
|---|----------|-----------|----------|

|   |           |           |           |
|---|-----------|-----------|-----------|
| C | 3.671057  | -1.090491 | 0.406407  |
| C | 4.840868  | -0.828787 | -0.308345 |
| C | 4.979319  | 0.373206  | -1.011824 |
| C | 3.938961  | 1.307509  | -0.991516 |
| C | 2.770541  | 1.044809  | -0.271046 |
| C | 1.377568  | -0.499642 | 1.238084  |
| C | 0.332211  | 0.473652  | 1.367171  |
| O | 1.279852  | -1.659630 | 1.713609  |
| H | 0.579451  | 1.525753  | 1.274048  |
| H | 3.552785  | -2.020639 | 0.951996  |
| H | 5.644230  | -1.560257 | -0.317638 |
| H | 5.888206  | 0.579589  | -1.569828 |
| H | 4.035253  | 2.242168  | -1.536705 |
| H | 1.978625  | 1.785629  | -0.272240 |
| H | -0.426734 | 0.244606  | 2.109882  |
| C | -3.334776 | -2.425485 | 0.378494  |
| C | -2.772979 | -1.148692 | 0.335253  |
| C | -1.538283 | -0.932544 | -0.300690 |
| C | -0.883023 | -2.023591 | -0.894833 |
| C | -1.446966 | -3.301333 | -0.856341 |
| C | -2.674194 | -3.507550 | -0.217565 |
| H | -4.289593 | -2.578806 | 0.873981  |
| H | -3.287248 | -0.307786 | 0.790145  |
| H | 0.069092  | -1.867890 | -1.395459 |
| H | -0.930270 | -4.133979 | -1.325440 |
| H | -3.114102 | -4.500253 | -0.186772 |
| C | -0.944552 | 0.431312  | -0.385456 |
| O | -1.711713 | 1.475628  | -0.269705 |
| H | -0.101932 | 0.500208  | -1.085803 |
| O | -0.709372 | 3.983015  | -0.156731 |
| H | -1.003234 | 4.499982  | -0.917687 |
| H | -1.014776 | 3.052284  | -0.323705 |
| O | -2.646903 | 2.930036  | 1.915536  |
| H | -2.125941 | 3.676375  | 1.578472  |
| H | -2.433445 | 2.227938  | 1.263949  |
| O | -3.850506 | 1.736401  | -1.991971 |
| H | -3.084057 | 1.641909  | -1.377886 |
| H | -4.430344 | 0.992410  | -1.785107 |

B2LYP:

Energy+ZPE (kcal/mol): -600662.6581288332

B3LYP:

Energy+ZPE (kcal/mol): -601825.0672976531

Frequencies: [-309.9222; 22.42; 30.48; 40.51; 51.9; 53.92; 59.38; 70.25; 74.48; 92.59; 109.15; 116.33; 121.33; 206.18; 217.52; 229.27; 232.15; 241.3; 281.85; 352.69; 359.89; 395.11; 504.54; 547.78; 564.19; 578.87; 586.83; 596.75; 600.14; 631.4; 650.54; 684.25; 713.49; 770.34; 869.45; 904.23; 906.05; 922.68; 969.1; 995.84; 1012.77; 1020.47; 1051.5; 1065.0; 1099.48; 1107.96; 1160.87; 1224.03; 1235.05; 1240.58; 1279.39; 1291.49;

1340.93; 1363.17; 1423.11; 1431.85; 1444.62; 1452.15; 1453.44; 1455.74; 1482.51;  
1501.76; 1502.64; 1518.96; 1578.95; 1586.99; 1612.15; 1691.25; 1692.43; 1710.71;  
1722.17; 1747.22; 1859.82; 1907.58; 1916.7; 1922.82; 1951.1; 1953.45; 2071.43;  
2117.08; 2133.05; 2151.55; 2191.1; 2193.09; 2273.42; 2338.07; 2340.3; 2343.49;  
2361.79; 2362.53; 2363.9; 2431.02; 4357.95; 4532.19; 4569.92; 4575.3; 4578.15;  
4587.45; 4590.93; 4605.14; 4605.75; 4613.83; 4623.31; 4626.31; 4664.24; 4703.28;  
4919.51; 5104.63; 5436.54; 5556.65; 5560.42]

### Step 3 TS (3‡) with 3 explicit water

|   |           |           |           |
|---|-----------|-----------|-----------|
| C | -2.803603 | 0.049309  | 0.640011  |
| C | -2.189040 | -0.991696 | -0.069587 |
| C | -2.806664 | -2.252258 | -0.077035 |
| C | -4.002822 | -2.472389 | 0.611782  |
| C | -4.605719 | -1.427225 | 1.320687  |
| C | -4.002222 | -0.165878 | 1.329524  |
| H | -2.348140 | 1.034125  | 0.642713  |
| H | -2.350119 | -3.068922 | -0.632646 |
| H | -4.466853 | -3.454724 | 0.588739  |
| H | -5.537809 | -1.592917 | 1.853481  |
| H | -4.465161 | 0.654385  | 1.871665  |
| C | 1.622280  | -1.336383 | -0.699948 |
| C | 2.891906  | -0.735510 | -0.176276 |
| C | 4.082669  | -0.979679 | -0.888433 |
| C | 2.947555  | 0.048553  | 0.990382  |
| C | 5.295836  | -0.456454 | -0.448993 |
| H | 4.036055  | -1.585384 | -1.786993 |
| C | 4.166734  | 0.573447  | 1.429108  |
| H | 2.052801  | 0.266869  | 1.561896  |
| C | 5.340697  | 0.323226  | 0.714289  |
| H | 6.205840  | -0.654119 | -1.007737 |
| H | 4.195915  | 1.179470  | 2.329652  |
| H | 6.285897  | 0.732342  | 1.059267  |
| O | 1.633410  | -1.966546 | -1.758512 |
| C | 0.320315  | -1.227925 | 0.083113  |
| H | 0.119641  | -2.233818 | 0.474766  |
| H | 0.392029  | -0.557599 | 0.940060  |
| C | -0.866989 | -0.787888 | -0.812446 |
| H | -0.874035 | -1.457507 | -1.682959 |
| O | -0.682454 | 0.527553  | -1.286904 |
| O | -0.045550 | 2.285268  | 0.282348  |
| H | 0.833456  | 2.600797  | 0.031810  |
| H | -0.355517 | 1.302365  | -0.512500 |
| O | -2.529687 | 1.824919  | -2.692971 |
| H | -1.878671 | 1.255785  | -2.185147 |
| H | -3.397139 | 1.424888  | -2.549964 |
| O | -1.909259 | 3.963217  | -0.829096 |
| H | -2.239479 | 3.360631  | -1.523126 |



|   |           |          |           |
|---|-----------|----------|-----------|
| H | -1.214534 | 3.422537 | -0.370339 |
| O | 0.193853  | 1.521337 | 2.812058  |
| H | 0.070599  | 1.823201 | 1.860277  |
| H | -0.692873 | 1.334126 | 3.144641  |

B2LYP:

Energy+ZPE (kcal/mol): -648564.4801586191

B3LYP:

Energy+ZPE (kcal/mol): -649802.672257795

Frequencies: [-261.1389; 23.11; 25.26; 33.66; 52.62; 59.35; 63.98; 73.9; 87.93; 98.46; 112.45; 136.19; 149.74; 215.56; 229.86; 254.85; 296.5; 311.48; 344.8; 359.08; 370.27; 406.31; 426.11; 531.79; 538.94; 594.18; 598.0; 599.99; 628.21; 666.05; 725.88; 741.79; 773.53; 798.36; 851.88; 868.79; 899.81; 901.07; 902.45; 909.17; 946.39; 983.84; 1004.27; 1028.29; 1089.36; 1112.12; 1119.65; 1200.58; 1235.22; 1242.37; 1246.66; 1275.45; 1303.85; 1306.21; 1340.05; 1343.96; 1388.94; 1425.1; 1436.77; 1445.42; 1447.93; 1454.29; 1455.52; 1464.92; 1502.05; 1508.83; 1523.42; 1564.94; 1592.93; 1607.89; 1691.99; 1697.87; 1716.38; 1722.55; 1733.74; 1762.38; 1799.84; 1855.63; 1914.41; 1926.89; 1952.11; 1957.35; 1985.01; 2013.32; 2073.36; 2109.24; 2128.49; 2132.78; 2196.83; 2197.73; 2331.73; 2335.5; 2341.57; 2358.46; 2367.9; 2395.3; 2413.27; 2448.71; 2461.63; 4350.64; 4364.27; 4384.37; 4473.17; 4523.08; 4554.4; 4572.68; 4584.37; 4585.66; 4598.21; 4604.71; 4613.17; 4620.29; 4630.57; 4634.5; 4765.42; 5233.0; 5517.72; 5554.44; 5556.6]

#### Step 4 TS (4<sup>‡</sup>) with 3 explicit water

|   |           |           |           |
|---|-----------|-----------|-----------|
| C | -3.544141 | -0.154841 | 0.532770  |
| C | -2.620262 | -0.696420 | -0.370796 |
| C | -2.826918 | -2.006751 | -0.832175 |
| C | -3.920295 | -2.759689 | -0.397005 |
| C | -4.833328 | -2.210989 | 0.511343  |
| C | -4.640861 | -0.905554 | 0.972569  |
| H | -3.414102 | 0.863087  | 0.886692  |
| H | -2.124941 | -2.439759 | -1.541621 |
| H | -4.063469 | -3.769887 | -0.770961 |
| H | -5.686667 | -2.792164 | 0.849115  |
| H | -5.346350 | -0.466794 | 1.673145  |
| C | 1.097505  | -0.352383 | -0.798742 |
| C | 2.290828  | -1.070528 | -0.209828 |
| C | 2.365844  | -1.437110 | 1.145006  |
| C | 3.371530  | -1.382986 | -1.051473 |
| C | 3.491954  | -2.097650 | 1.643059  |
| H | 1.553553  | -1.193432 | 1.821191  |
| C | 4.492522  | -2.052744 | -0.558657 |
| H | 3.315681  | -1.093770 | -2.095770 |
| C | 4.557106  | -2.411354 | 0.792580  |
| H | 3.538185  | -2.364671 | 2.695004  |
| H | 5.315698  | -2.293427 | -1.225558 |

|   |           |           |           |
|---|-----------|-----------|-----------|
| H | 5.430477  | -2.928432 | 1.179722  |
| O | 1.227199  | 0.201085  | -1.910184 |
| C | -0.143068 | -0.295465 | -0.031198 |
| H | -0.290707 | -1.168575 | 0.607193  |
| H | -0.010283 | 0.722039  | 0.827794  |
| C | -1.393752 | 0.076255  | -0.842069 |
| H | -1.225138 | -0.163528 | -1.898334 |
| O | -1.622225 | 1.502432  | -0.833482 |
| O | -0.070320 | 1.820586  | 1.522213  |
| H | -0.308575 | 1.578318  | 2.428806  |
| H | -1.362186 | 1.818867  | 0.052830  |
| O | 2.427051  | 2.807703  | 0.710632  |
| H | 2.074404  | 3.080969  | -0.156349 |
| H | 1.635765  | 2.412424  | 1.142407  |
| O | 0.625452  | 3.528580  | -1.526718 |
| H | 0.194715  | 2.662491  | -1.634740 |
| H | 0.105168  | 3.960944  | -0.816301 |
| O | -0.722904 | 4.346578  | 0.835000  |
| H | -0.478782 | 3.460148  | 1.222514  |
| H | -0.234471 | 5.008688  | 1.341226  |

B2LYP:

Energy+ZPE (kcal/mol): -648545.3759608688

B3LYP:

Energy+ZPE (kcal/mol): -649784.993446738

Frequencies: [-1140.4278; 26.79; 41.84; 50.55; 54.41; 72.8; 86.09; 121.48; 125.9; 138.74; 165.82; 198.54; 200.19; 210.24; 268.25; 273.22; 292.59; 306.37; 330.21; 351.61; 381.16; 407.19; 467.57; 501.88; 559.32; 594.15; 595.49; 597.15; 612.22; 678.89; 694.18; 716.18; 745.99; 763.49; 801.5; 825.06; 851.67; 885.03; 905.24; 906.6; 937.08; 970.72; 982.29; 1008.57; 1016.33; 1022.6; 1036.26; 1084.71; 1105.87; 1130.63; 1147.38; 1234.72; 1240.15; 1267.6; 1327.83; 1351.86; 1372.88; 1398.55; 1418.45; 1425.64; 1431.62; 1442.35; 1454.02; 1454.72; 1456.12; 1499.08; 1509.54; 1515.97; 1562.66; 1586.17; 1592.82; 1692.33; 1692.95; 1718.87; 1722.63; 1736.26; 1765.1; 1800.68; 1851.64; 1914.71; 1926.0; 1950.42; 1953.82; 1989.82; 2053.33; 2103.53; 2123.73; 2129.71; 2190.79; 2197.48; 2240.83; 2319.81; 2339.09; 2356.02; 2361.2; 2368.24; 2378.2; 2411.06; 2446.22; 4387.72; 4483.17; 4557.76; 4572.17; 4575.98; 4585.16; 4588.31; 4601.8; 4603.13; 4605.63; 4611.7; 4620.82; 4624.81; 5008.47; 5106.47; 5203.25; 5296.71; 5384.98; 5498.94; 5555.59]

### Step 5 TS (5<sup>‡</sup>) with 3 explicit water

|   |           |           |           |
|---|-----------|-----------|-----------|
| C | -2.645177 | -1.443984 | 0.917134  |
| C | -2.447441 | -0.761026 | -0.298353 |
| C | -3.519838 | -0.694681 | -1.207669 |
| C | -4.746447 | -1.297191 | -0.920041 |

|   |           |           |           |
|---|-----------|-----------|-----------|
| C | -4.927756 | -1.972399 | 0.290838  |
| C | -3.871684 | -2.040288 | 1.208524  |
| H | -1.842753 | -1.496966 | 1.646141  |
| H | -3.385934 | -0.166439 | -2.148066 |
| H | -5.558765 | -1.237374 | -1.638639 |
| H | -5.881518 | -2.438455 | 0.520349  |
| H | -4.006694 | -2.556813 | 2.154549  |
| C | 1.309955  | -0.139866 | -0.770823 |
| C | 2.575643  | -0.808528 | -0.303769 |
| C | 2.590735  | -2.084245 | 0.287656  |
| C | 3.796973  | -0.137624 | -0.490901 |
| C | 3.795902  | -2.671083 | 0.681402  |
| H | 1.666991  | -2.637000 | 0.421149  |
| C | 4.999390  | -0.716924 | -0.085162 |
| H | 3.785996  | 0.844219  | -0.951957 |
| C | 5.002654  | -1.987721 | 0.501514  |
| H | 3.791880  | -3.662339 | 1.125241  |
| H | 5.932985  | -0.179955 | -0.226080 |
| H | 5.938362  | -2.442585 | 0.813508  |
| O | 1.407713  | 0.747419  | -1.656168 |
| C | 0.056714  | -0.551814 | -0.183299 |
| H | 0.097965  | -1.223498 | 0.665667  |
| C | -1.163236 | -0.141633 | -0.669761 |
| H | -1.168029 | 0.412747  | -1.600193 |
| O | -1.721947 | 1.851108  | 0.173364  |
| H | -2.687752 | 1.892171  | 0.147641  |
| O | -0.084694 | 3.099361  | -1.447900 |
| H | 0.439813  | 2.273145  | -1.520925 |
| H | -0.847467 | 2.763399  | -0.881243 |
| O | 0.963672  | 4.414956  | 0.827103  |
| H | 0.690098  | 4.042521  | -0.040730 |
| H | 0.465279  | 3.863560  | 1.468514  |
| O | -0.677223 | 2.686613  | 2.354824  |
| H | -0.233025 | 1.942318  | 2.780809  |
| H | -1.135926 | 2.305729  | 1.510746  |

B2LYP:

Energy+ZPE (kcal/mol): -600665.7887448787

B3LYP:

Energy+ZPE (kcal/mol): -601832.695924566

Frequencies: [-101.5863; 16.94; 26.58; 40.7; 54.39; 59.96; 70.71; 84.47; 94.75; 135.5; 176.39; 213.09; 242.32; 250.58; 272.64; 319.1; 322.09; 360.44; 388.04; 395.47; 426.82; 457.86; 516.83; 580.47; 596.35; 596.55; 618.52; 656.58; 737.34; 763.11; 788.66; 807.09; 832.12; 859.08; 881.48; 905.11; 908.71; 968.88; 986.45; 999.13; 1007.46; 1021.73; 1028.81; 1095.84; 1148.92; 1156.09; 1165.36; 1213.01; 1231.27; 1239.55; 1306.18; 1344.05; 1366.54; 1422.14; 1432.4; 1446.03; 1451.05; 1454.82; 1456.23; 1456.56; 1483.71; 1503.02; 1508.19; 1558.57; 1584.73; 1595.57; 1644.16; 1695.37; 1696.19; 1722.3; 1728.3; 1762.59; 1783.61; 1873.0; 1907.19; 1927.7; 1952.76; 1959.65; 1983.64;

2116.7; 2130.77; 2188.68; 2197.87; 2218.56; 2315.07; 2334.89; 2355.04; 2364.86;  
2366.22; 2368.31; 2445.91; 2472.61; 3618.88; 4355.33; 4574.51; 4580.45; 4582.67;  
4592.64; 4595.24; 4606.39; 4608.24; 4616.02; 4619.26; 4628.03; 4631.31; 4640.27;  
5016.41; 5081.93; 5116.24; 5513.88; 5547.13]
